# Supplementary material for: Decoding breast cancer tissue–stroma interactions using species-specific sequencing
Source: PubMed Central journal article supplement (PMC4534116; doi:10.1186/s13058-015-0616-x), 2015-08-13
Supplement: 13058_2015_616_MOESM3_ESM.pdf [file 13058_2015_616_MOESM3_ESM.pdf]

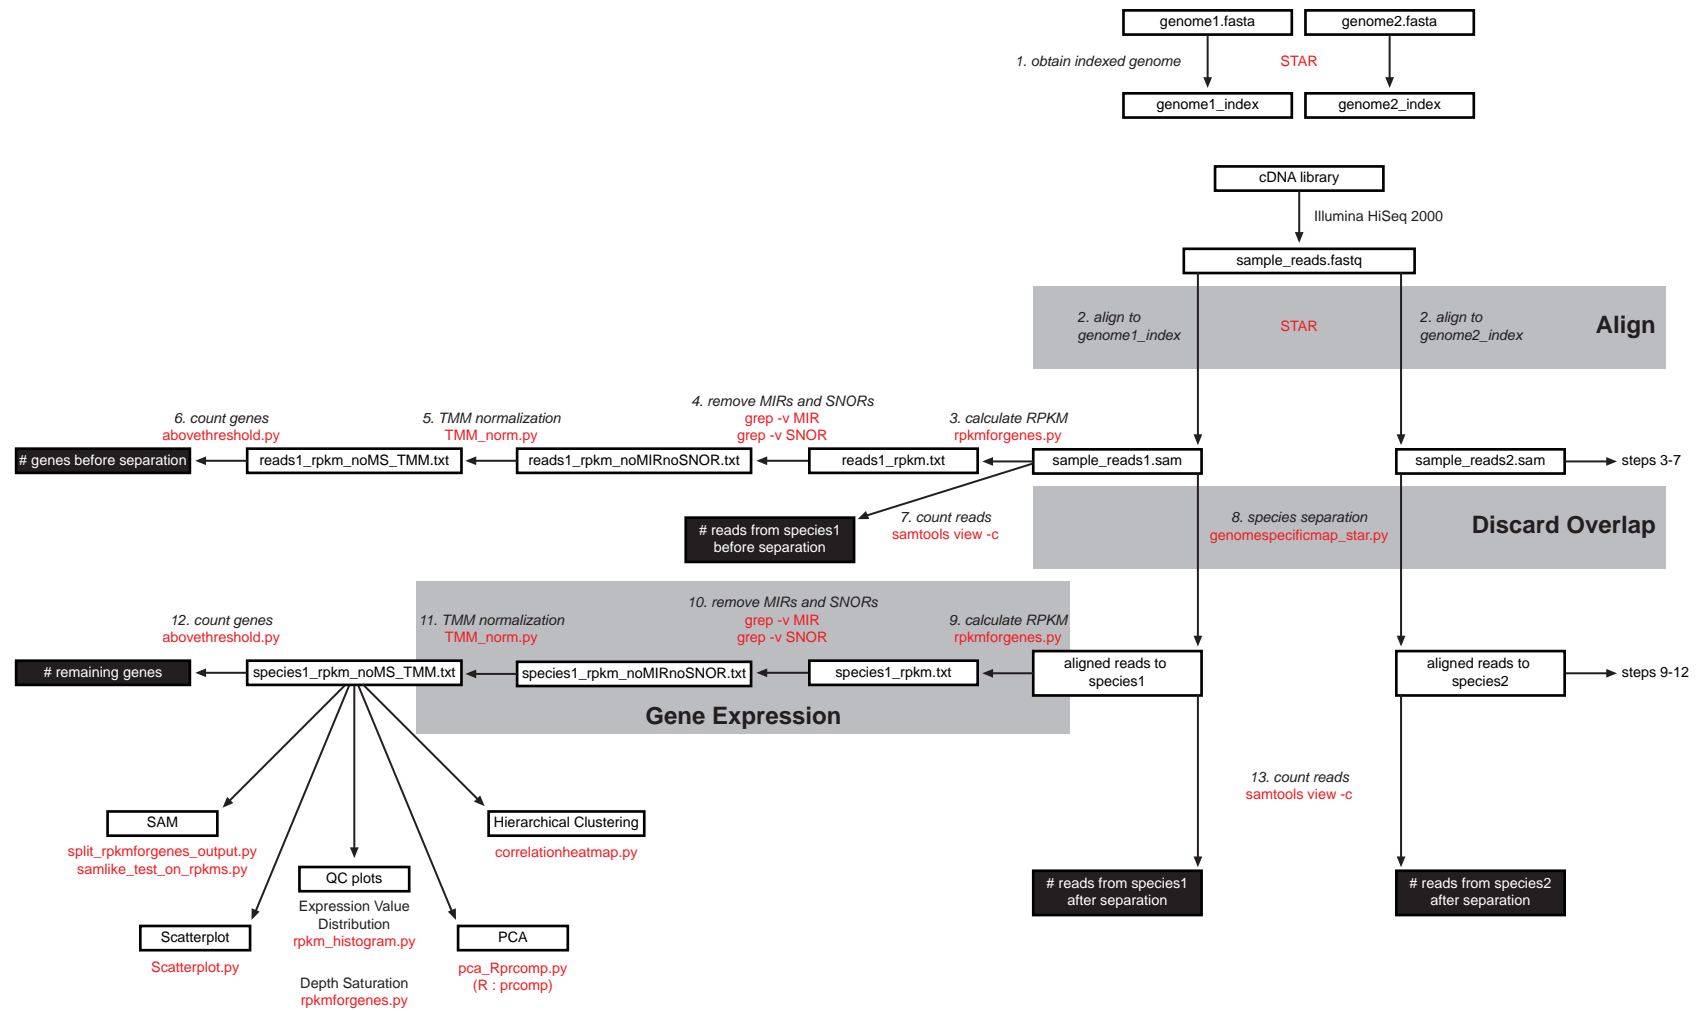

**Figure S1.** Pipeline of data processing.

This figure shows the steps used to produce the expression values (steps 1,2,8-11) as well as how to calculate numbers (black boxes) that are referenced in the formulas in Table S3. The grey boxes highlight the steps after cDNA library preparation and sequencing, indicated in Figure 1A.

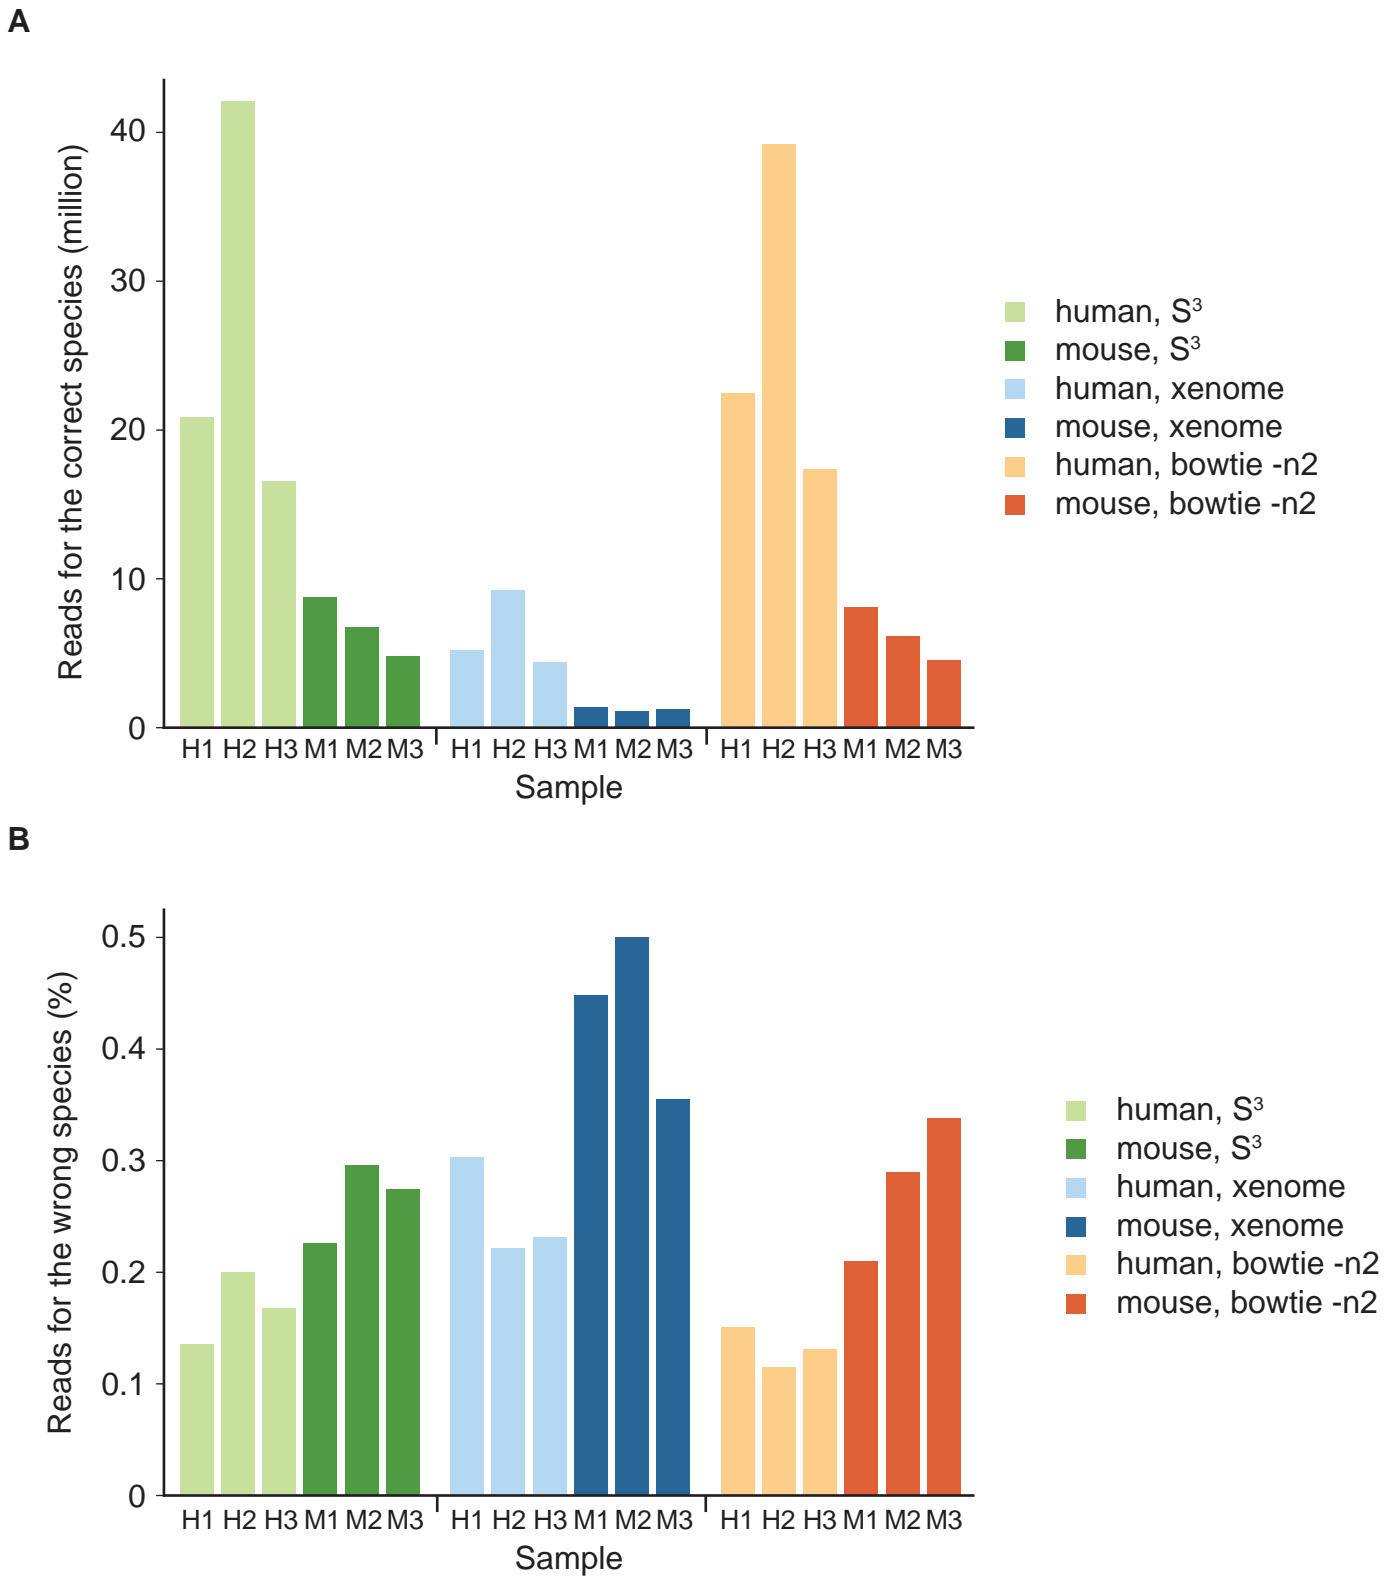

**Figure S2.** Comparison with other methods to separate human and mouse reads, both in terms of sensitivity (A) and specificity (B). We compared STAR-based S<sup>3</sup> to another algorithm of ours (genome+transcriptome bowtie alignment allowing two mismatches in the seed region) and to the species separation method Xenome (Conway et al. 2012), followed by STAR alignment with default parameters. M1-3 are mouse samples, H1-3 are human samples.

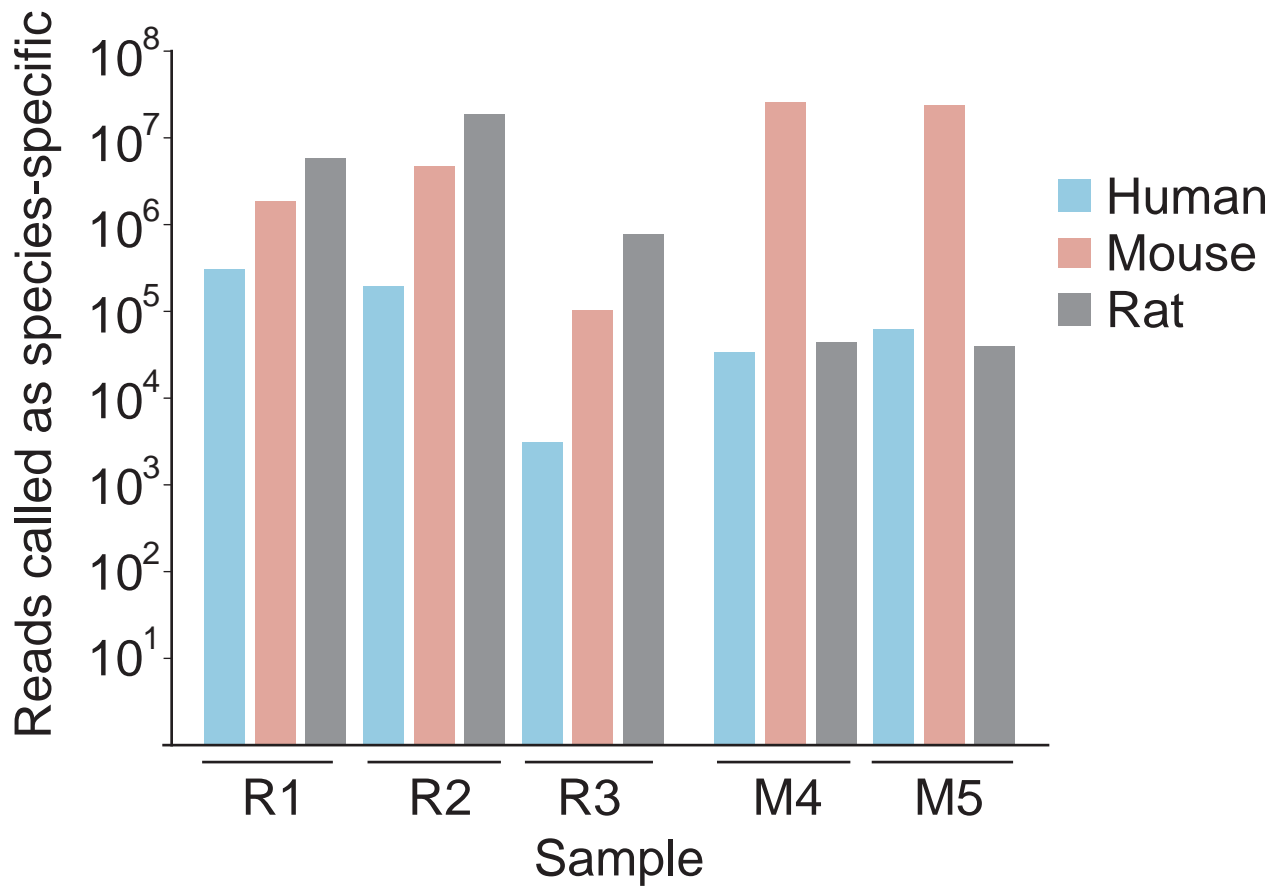

**Figure S3.** Comparison of three species (rat, mouse, human) separation of rat (R1-R3) and mouse (M4, M5) RNA-seq samples, similar to Figure 1F but with absolute number of reads on the y axis. The mouse samples have a 50 bp read length, similar to the 51 bp of R2.

**A**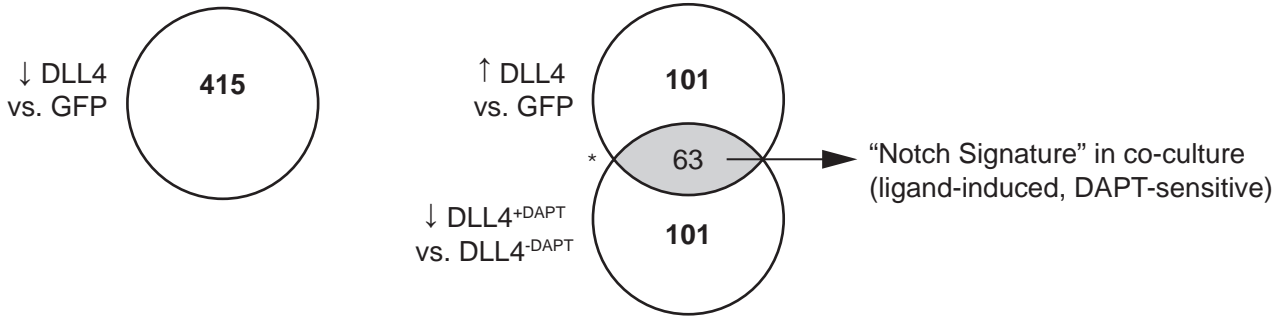**B**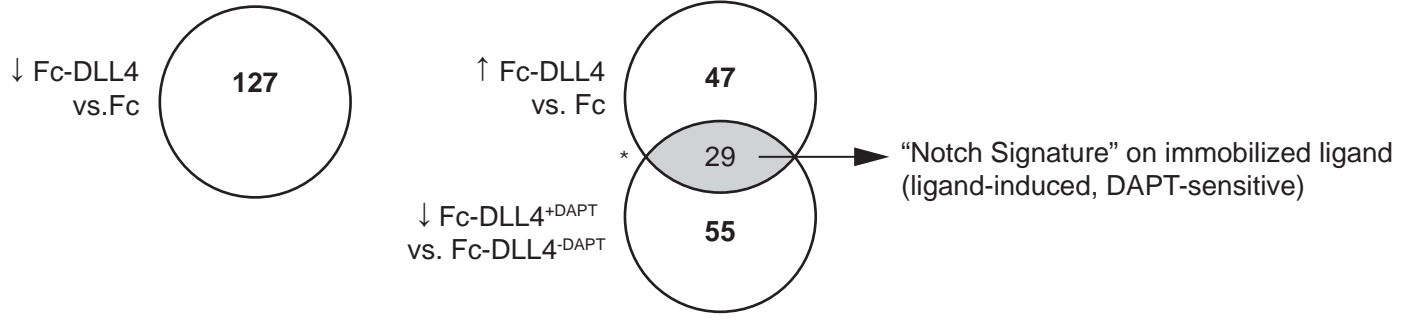**C**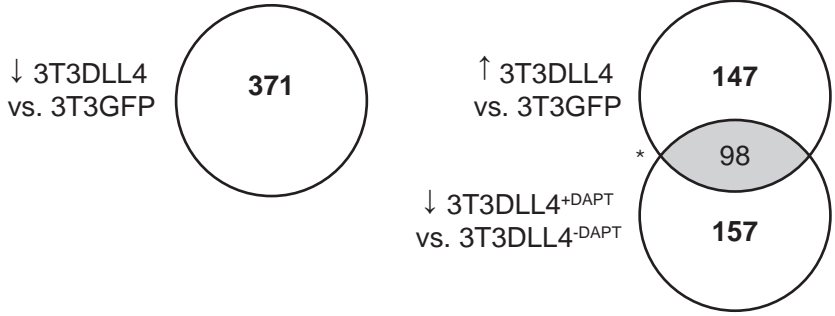

**Figure S4.** Comparison of the number of genes up- and downregulated in (A) MDA-MB-231 cells co-cultured with 3T3-L1 cells expressing DLL4 or GFP, (B) MDA-MB-231 cells on immobilized Fc-DLL4 or Fc, and (C) 3T3-L1 cells, expressing DLL4 or GFP, co-cultured with MDA-MB-231 cells. In (A) and (B), a "Notch Signature" is defined as genes upregulated through ligand induction and downregulated after DAPT treatment. Up- and downregulation is defined as FC>2. \* signifies p<0.05 (Fisher's exact test).

## Human expression values:

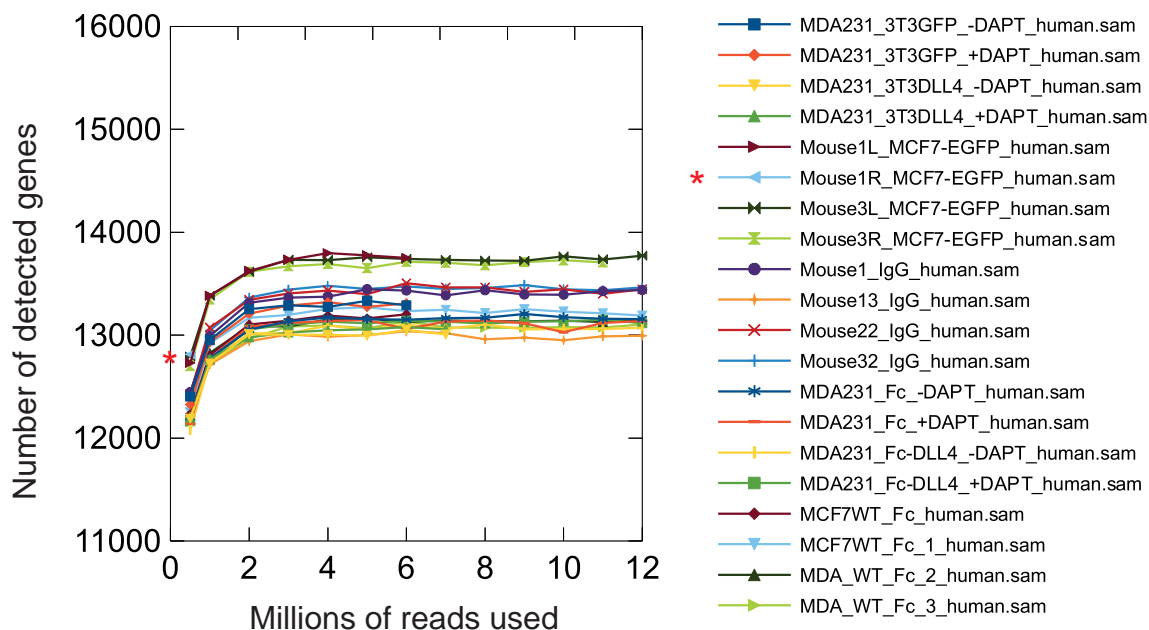

## Mouse expression values:

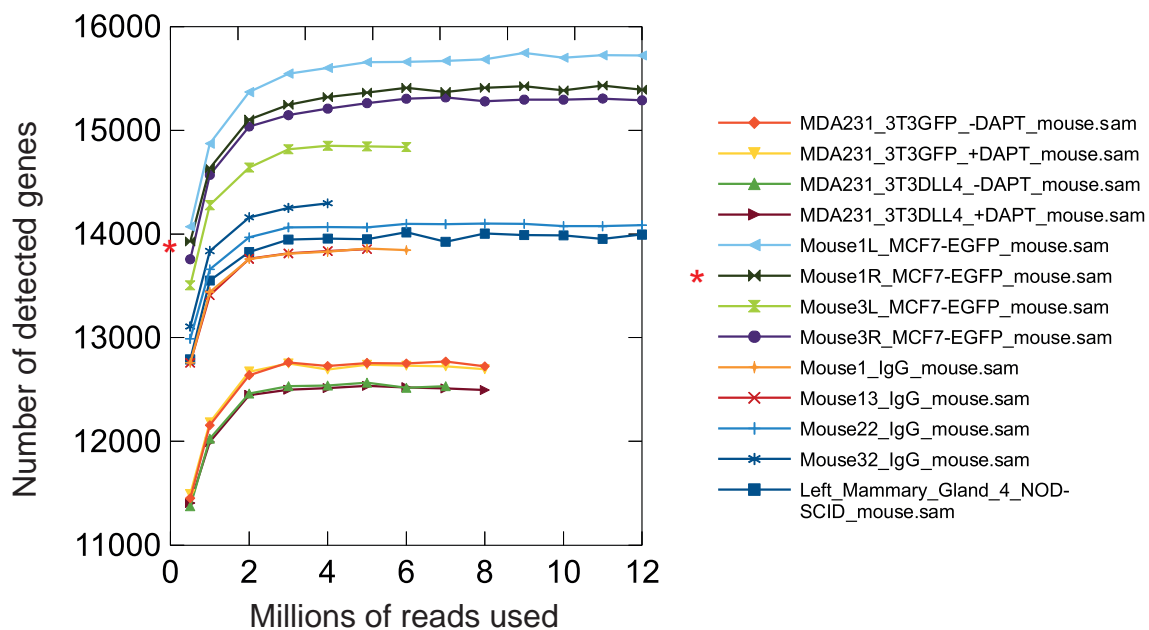

**Figure S5.** Whole-genome gene expression QC: Depth Saturation.

The graphs show the number of expressed genes (>0.3 RPKM) after downsampling to 0.5-12 million mapped reads. All samples generated in the study are shown, including one sample marked by a red asterisk which was excluded for failing quality control. The total number of reads for each sample is listed under “# reads” in Additional file 4: Table S3. Samples containing cell lines yielded fewer detected genes than samples containing mouse stroma, presumably because the latter is a more complex tissue containing many cell types. As seen above, gene detection levels out after 2-3 million reads, which is less than our sequencing depths (excluding the sample marked by \*).

*in vitro* (human):

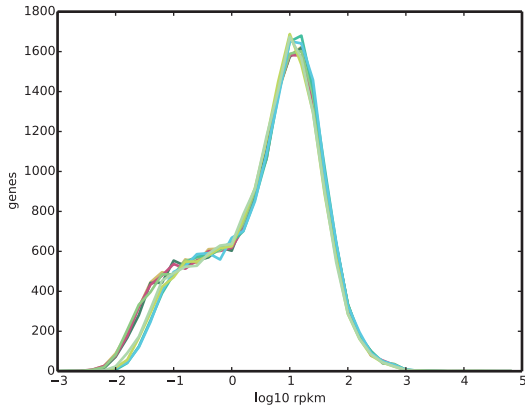

- MDA231\_Fc\_noDAPT\_human.sam
- MDA231\_Fc\_DAPT\_human.sam
- MDA231\_Fc-DLL4\_noDAPT\_human.sam
- MDA231\_Fc-DLL4\_DAPT\_human.sam
- MDA231\_3T3GFP\_noDAPT\_human.sam
- MDA231\_3T3GFP\_DAPT\_human.sam
- MDA231\_3T3DLL4\_noDAPT\_human.sam
- MDA231\_3T3DLL4\_DAPT\_human.sam

*in vitro* (mouse):

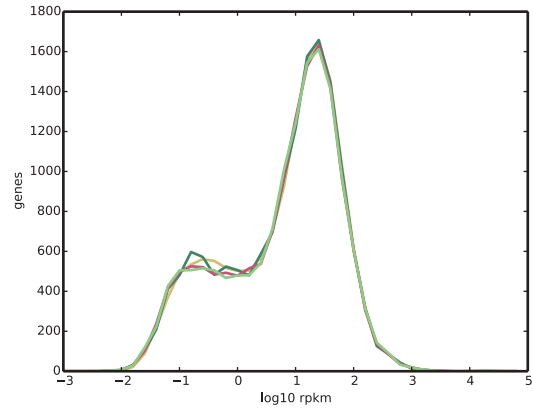

- MDA231\_3T3GFP\_noDAPT\_mouse.sam
- MDA231\_3T3GFP\_DAPT\_mouse.sam
- MDA231\_3T3DLL4\_noDAPT\_mouse.sam
- MDA231\_3T3DLL4\_DAPT\_mouse.sam

*in vivo* (human):

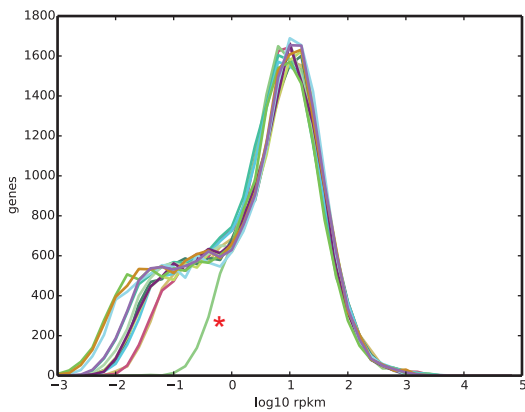

- MCF7WT\_Fc\_noDAPT\_human.sam
- MCF7WT\_Fc\_noDAPT\_1\_human.sam
- Mouse1L\_MCF7-EGFP\_human.sam
- Mouse1R\_MCF7-EGFP\_human.sam
- Mouse3L\_MCF7-EGFP\_human.sam
- Mouse3R\_MCF7-EGFP\_human.sam
- MDA231\_Fc\_noDAPT\_human.sam
- MDA\_WT\_Fc\_noDAPT\_2\_human.sam
- MDA\_WT\_Fc\_noDAPT\_3\_human.sam
- Mouse1\_IgG\_human.sam
- Mouse13\_IgG\_human.sam
- Mouse22\_IgG\_human.sam
- Mouse32\_IgG\_human.sam

*in vivo* (mouse):

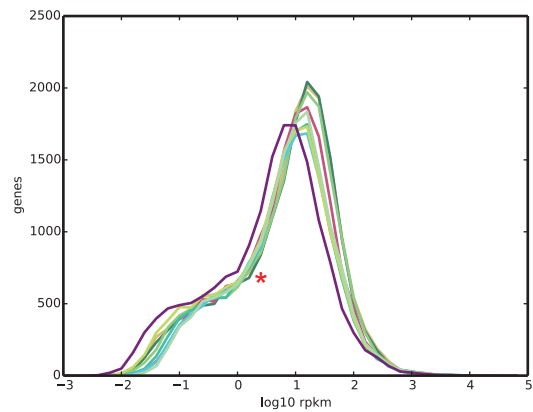

- Mouse1L\_MCF7-EGFP\_mouse.sam
- Mouse1R\_MCF7-EGFP\_mouse.sam
- Mouse3L\_MCF7-EGFP\_mouse.sam
- Mouse3R\_MCF7-EGFP\_mouse.sam
- Mouse1\_IgG\_mouse.sam
- Mouse13\_IgG\_mouse.sam
- Mouse22\_IgG\_mouse.sam
- Mouse32\_IgG\_mouse.sam
- Left\_Mammary\_Gland\_4\_NOD-SCID\_mouse.sam

**Figure S6.** Whole-Genome Gene Expression QC: Density Plots after TMM Normalization. The plots show RPKM distributions for all samples generated in the study, including one sample marked by a red asterisk which was excluded for failing quality control (see also Figure S5).

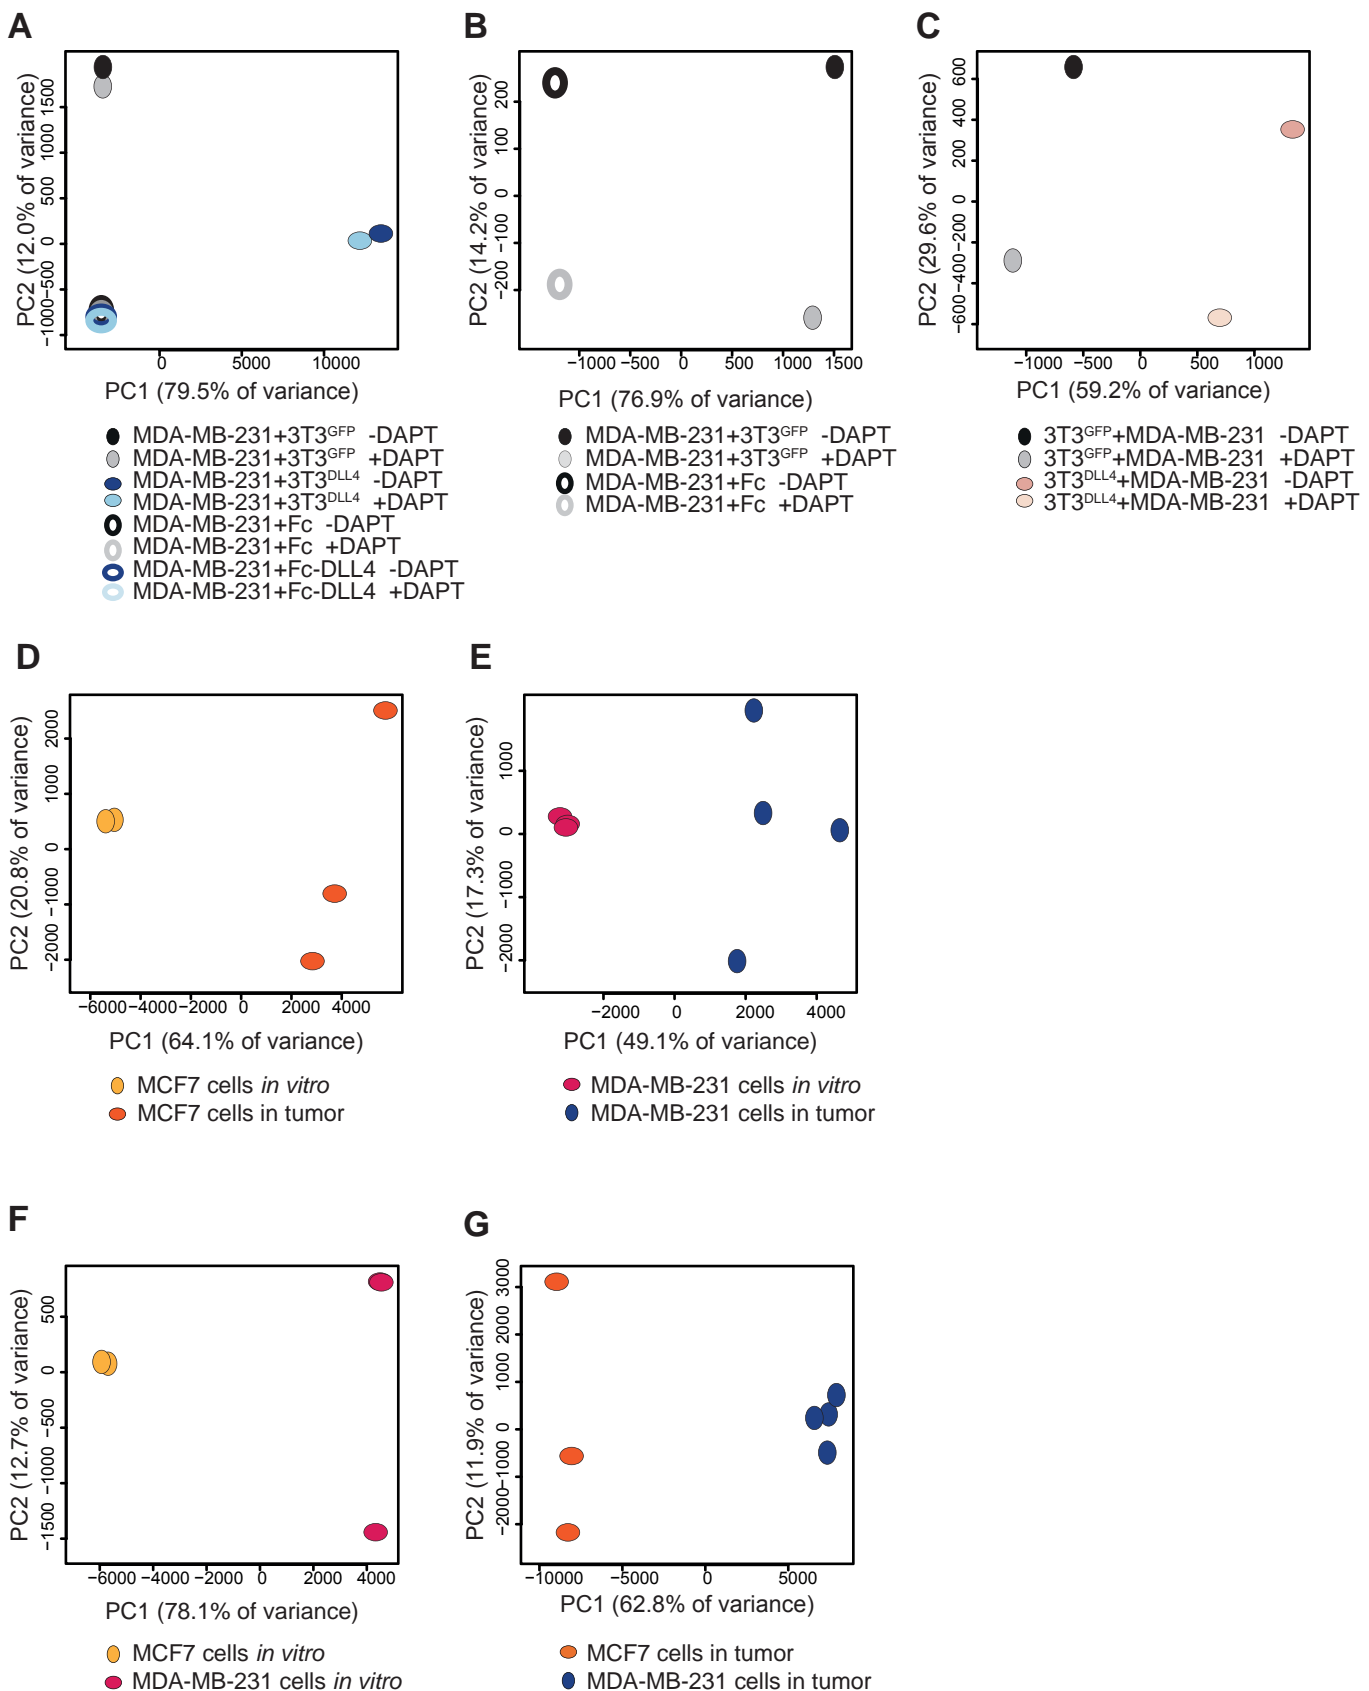

**Figure S7:** Additional principal component analyses (PCA). These use the expression values of all human or mouse genes and show the first and second principal components. Additional sample information can be found in Additional File 4: Table S3.

- (A) MDA-MB-231 (DLL4-ligand-activated) cells cultured with 3T3-L1 cells expressing/not expressing DLL4 or on immobilized ligand and in the presence or absence of DAPT, as indicated.
- (B) MDA-MB-231 cells cultured with 3T3-L1 cells or on Fc-fragment.
- (C) 3T3-L1 (ligand-expressing) cells in co-culture.
- (D) MCF7 cells *in vitro* (left to right: Fc<sub>1</sub>, Fc) and in tumor (top to bottom: 1L, 3L, 3R).
- (E) MDA-MB-231 cells *in vitro* (top to bottom: Fc, Fc<sub>2</sub>, Fc<sub>3</sub>) and in tumor (top to bottom: 22, 32, 13, 1).
- (F) MCF7 (left to right: Fc, Fc<sub>1</sub>) and MDA-MB-231 (top to bottom: Fc<sub>2</sub>, Fc<sub>3</sub>, Fc) cells *in vitro*.
- (G) MCF7 (top to bottom: 1L, 3L, 3R) and MDA-MB-231 (top to bottom: 13, 32, 22, 1) cells in tumor.

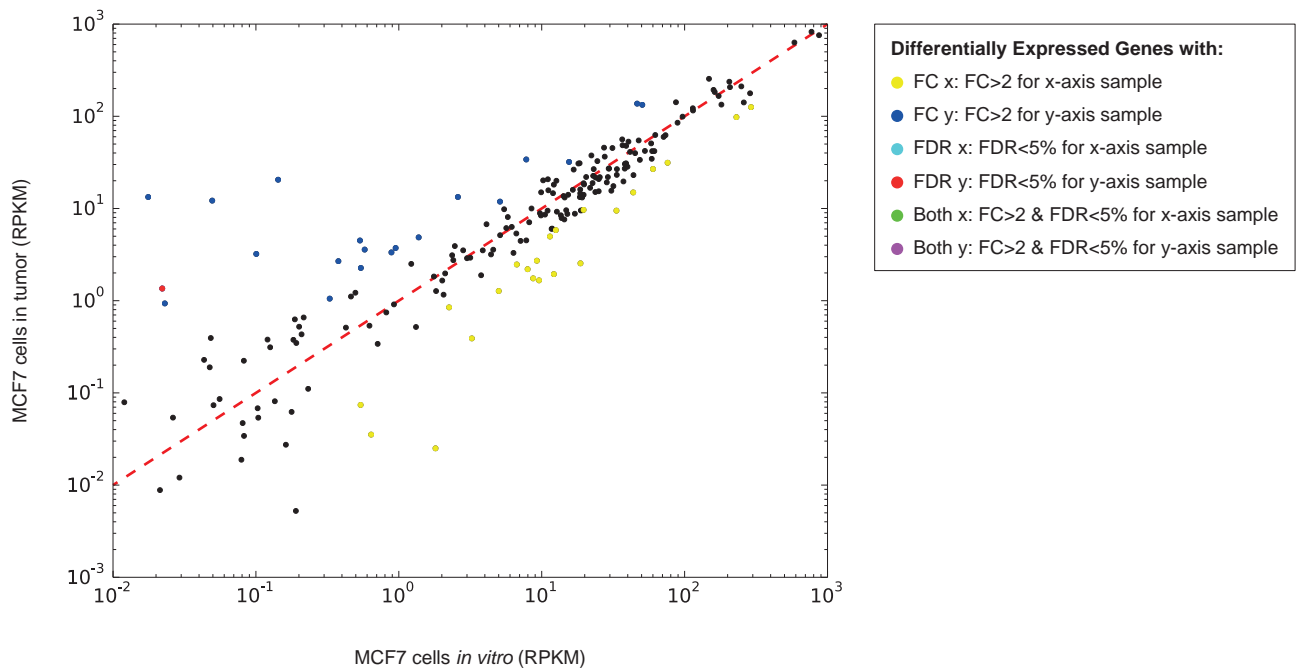

### Gene Set:

|        |          |        |         |          |          |       |
|--------|----------|--------|---------|----------|----------|-------|
| ADAM17 | CTNNAL1  | IKBKB  | MMP9    | PLCB4    | SHC1     | VEGFA |
| AKT1   | CTNNBIP1 | IKBKE  | MNAR    | PLCD1    | SHC2     | VEGFB |
| AKT2   | CTNND1   | IKBKKG | MTA3    | PLCD3    | SHC3     | VEGFC |
| AKT3   | CTNND2   | IL6    | MYBBP1A | PLCD4    | SHC4     | ZEB2  |
| AP1B1  | DDX5     | ITGA2  | NCOA1   | PLCE1    | SMARCA1  |       |
| AP1G1  | E2F1     | JUN    | NCOA2   | PLCG1    | SMARCA2  |       |
| AP1M1  | E2F2     | KAT3A  | NCOA3   | PLCG2    | SMARCA4  |       |
| AP1M2  | EBAG9    | KRAS   | NCOR1   | PLCH1    | SMARCA5  |       |
| AP1S1  | EGF      | LAMA5  | NCOR2   | PLCH2    | SMARCAL1 |       |
| AP1S2  | EGFR     | LDLR   | NEDD8   | PLCXD1   | SMARCB1  |       |
| AP1S3  | ELK1     | MAPK1  | NFKB1   | PLCXD2   | SMARCC1  |       |
| ARAF   | EMILIN1  | MAPK10 | NFKB2   | PLCXD3   | SMARCC2  |       |
| AREG   | EMILIN2  | MAPK11 | NFKBIA  | PLCZ1    | SMARCD1  |       |
| AREGB  | EMILIN3  | MAPK12 | NFYA    | PRKACA   | SMARCD2  |       |
| ATF1   | EP300    | MAPK14 | NFYB    | PRKACB   | SMARCD3  |       |
| ATF2   | EREG     | MAPK3  | NFYC    | PRKACG   | SMARCE1  |       |
| BCL2   | ESR1     | MAPK7  | NOS1    | PRKCA    | SNAI1    |       |
| BCL2L1 | ESR2     | MAPK8  | NOS2    | PRKCB    | SNAI2    |       |
| BMP7   | ESRRA    | MAPK9  | NOS3    | PRKCD    | SNAI3    |       |
| BRAF   | ESRRB    | MED1   | NR0B2   | PRKCE    | SNRK     |       |
| BTC    | ESRRG    | MMP1   | NRAS    | PRKCG    | SOL4A6   |       |
| CARM1  | FGF10    | MMP10  | NRIP1   | PRKCH    | SP1      |       |
| CAV1   | FGFR1    | MMP11  | OCLN    | PRKCI    | SRC      |       |
| CAV2   | FGFR2    | MMP12  | PELP1   | PRKCQ    | STAT1    |       |
| CAV3   | FGFR3    | MMP13  | PIK3C2A | PRKCZ    | STAT3    |       |
| CBP    | FGFR4    | MMP14  | PIK3C2B | PRL      | STAT5A   |       |
| CCND1  | FOS      | MMP15  | PIK3C2G | PRMT1    | STAT5B   |       |
| CD44   | GJB1     | MMP16  | PIK3C3  | RAF1     | STRIP1   |       |
| CDH1   | GPER1    | MMP17  | PIK3CA  | RARA     | STRIP2   |       |
| CDH3   | GPR182   | MMP19  | PIK3CB  | RARB     | STRN     |       |
| COL4A1 | GRB2     | MMP2   | PIK3CD  | RARG     | STRN3    |       |
| COL4A2 | GSK3B    | MMP20  | PIK3CG  | REL      | STRN4    |       |
| COL4A3 | HBEGF    | MMP21  | PIK3R1  | RELA     | TGFA     |       |
| COL4A4 | HDAC4    | MMP24  | PIK3R2  | RELB     | TGFB1    |       |
| COL4A5 | HSP90AA1 | MMP25  | PIK3R3  | RSTS     | TIMP2    |       |
| COL7A1 | HSP90AB1 | MMP26  | PIK3R4  | SAFB     | TRAP     |       |
| CREBBP | HSPB1    | MMP27  | PIK3R5  | SAFB2    | TWIST1   |       |
| CSN2   | HSPB2    | MMP28  | PIK3R6  | SAP30    | TWIST2   |       |
| CTNNA1 | HSPB3    | MMP3   | PLCB1   | SERPINB5 | UCP1     |       |
| CTNNA2 | HSPD1    | MMP7   | PLCB2   | SERPINB6 | UCP2     |       |
| CTNNA3 | IGF1     | MMP8   | PLCB3   | SERPINB7 | UCP3     |       |

**Figure S8.** Scatterplot of genes in Estrogen-related signaling, differentially expressed in MCF7 cells *in vitro* and MCF7 cells in tumor.

#### Gene Set Sources:

Marino M, et al. Estrogen Signaling Multiple Pathways to Impact Gene Transcription. *Curr Genomics*. 2006 Nov; 7(8): 497–508.  
 Heldring N, et al. Estrogen Receptors: How Do They Signal and What Are Their Targets. *Physiological Reviews*. 1 July 2007; 87(3): 905-931  
 Tocris Bioscience. Estrogen Signaling Pathway. 2015. <http://www.tocris.com/pathways/estrogenPathway.php#.VTZRkq2qpBc>



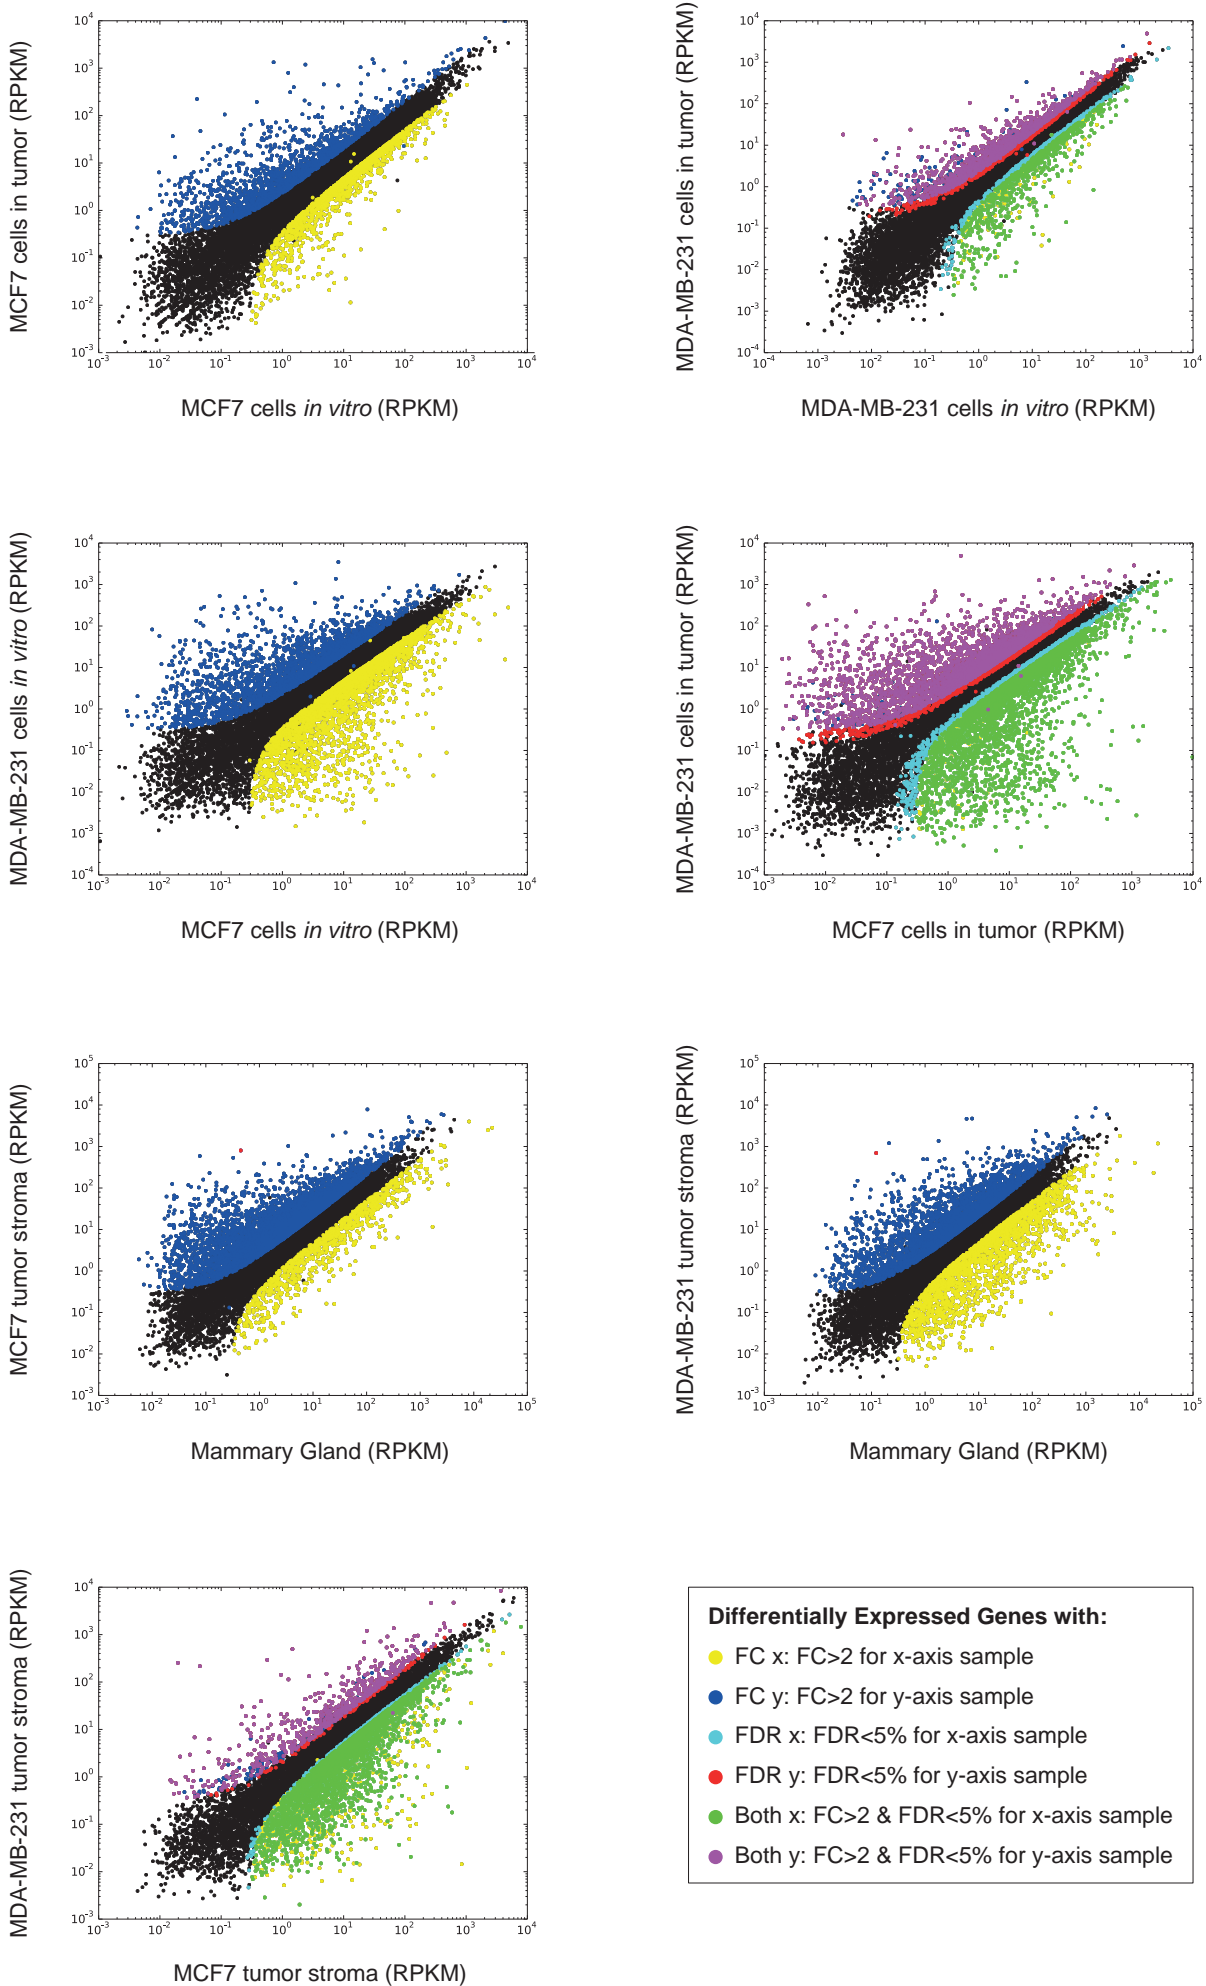

**Figure S9.** Scatterplots of Table S5 comparison groups.

**A. Human expression values:**

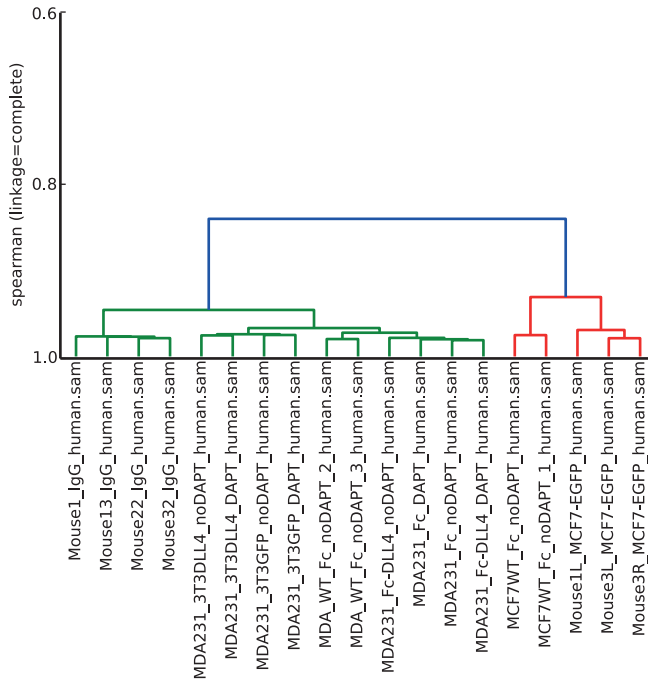

**B. Mouse expression values:**

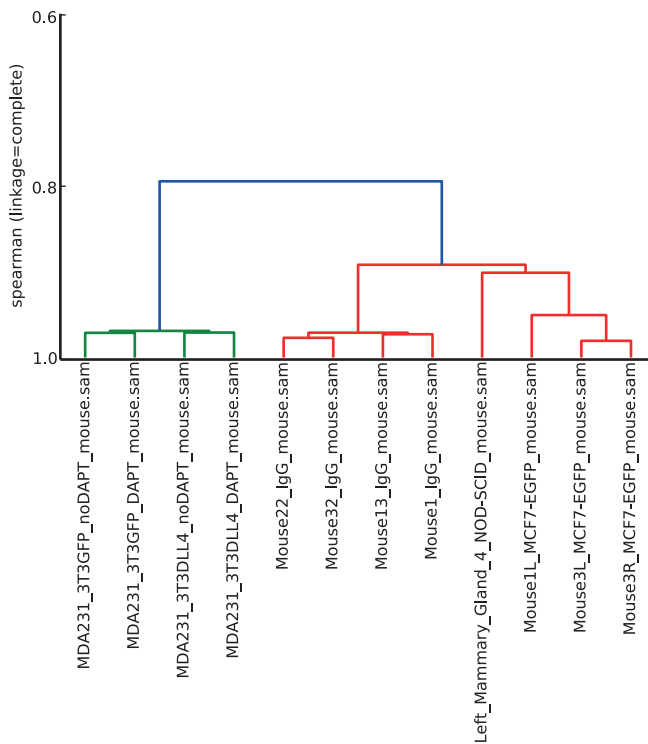

**Figure S10. Hierarchical Clustering.**

(A) shows human expression values, (B) shows mouse expression values. Human-only samples are only included in (A), mouse-only samples are only included in (B). Clustering is done by complete linkage neighbor-joining of 1-Spearman correlation coefficients. For human expression values, samples containing MDA-MB-231 cells cluster in green and samples containing MCF7 cells cluster in red. For mouse expression values, *in vitro* samples cluster in green and *in vivo* samples cluster in red. The mammary gland sample clusters more closely with MCF7 tumor stroma than MDA-MB-231 tumor stroma.

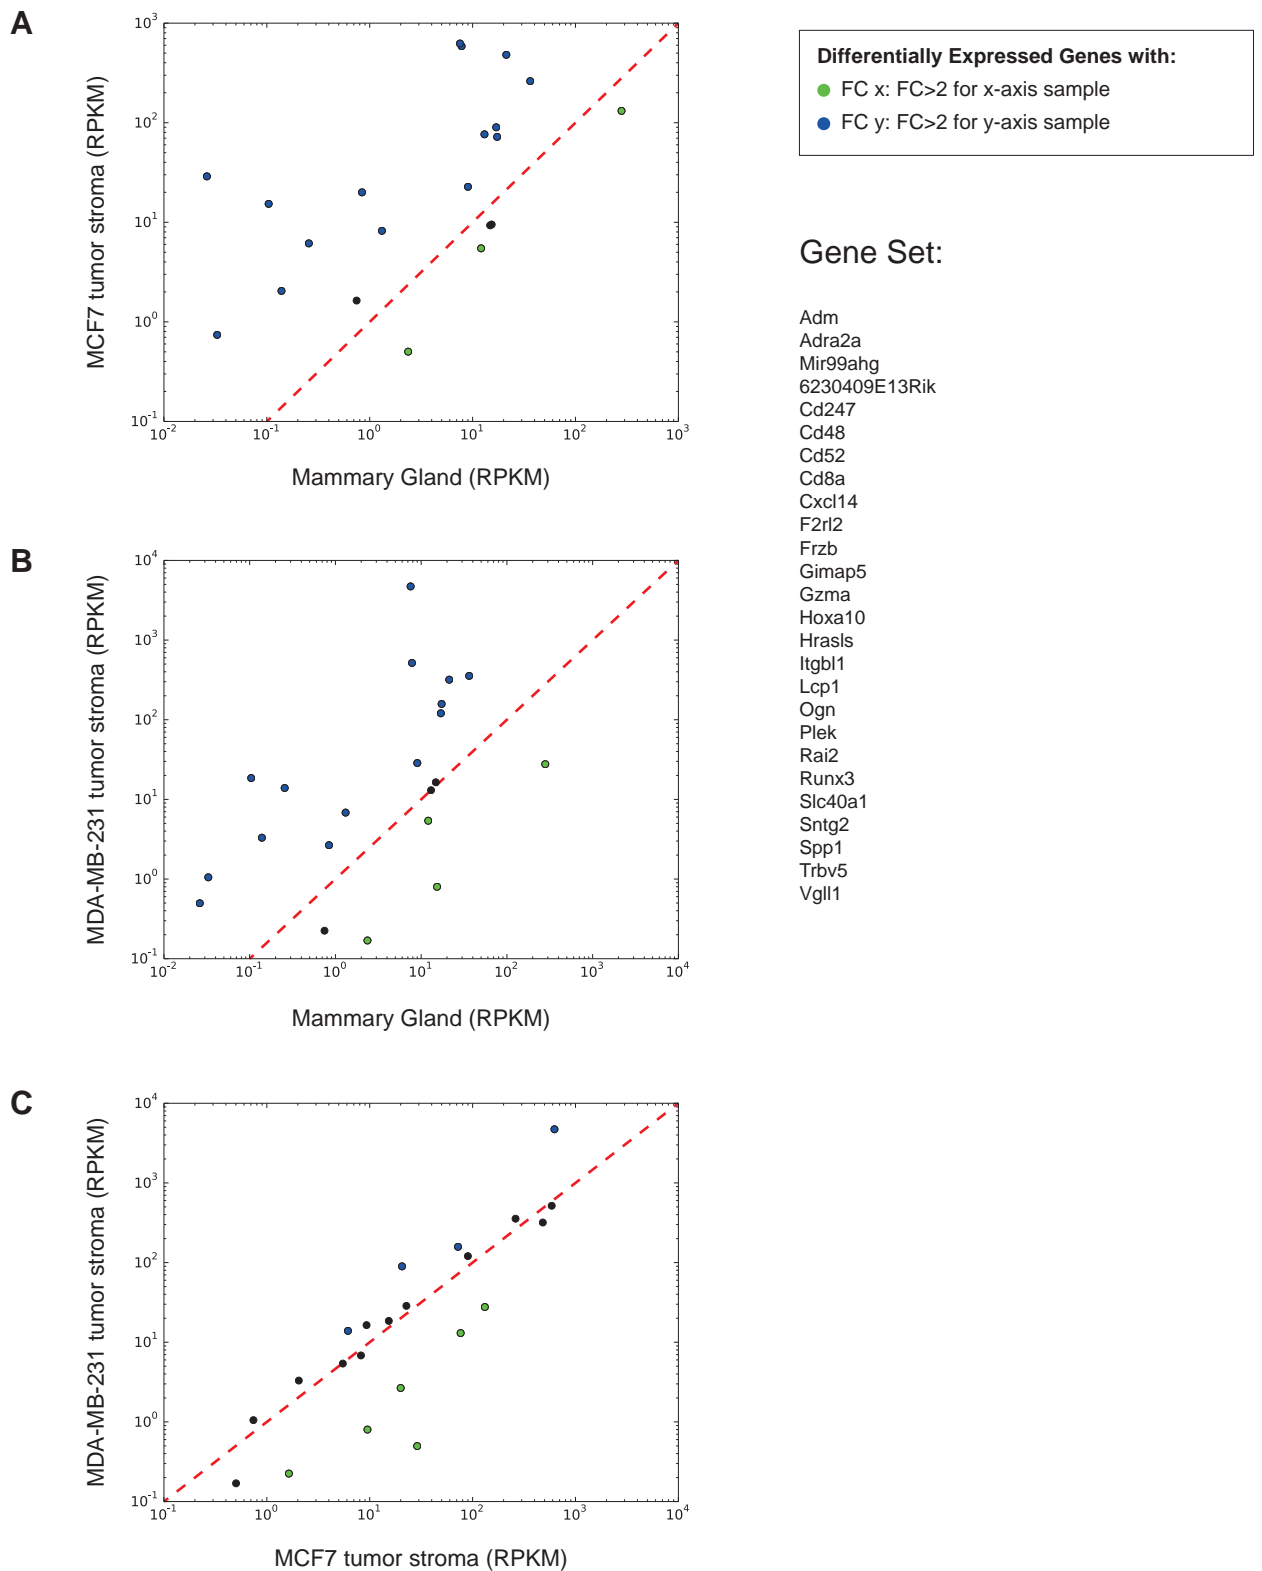

**Figure S11.** FINAK\_BREAST\_CANCER\_SDPP\_SIGNATURE: Scatterplot of genes in the stroma-derived prognostic predictor of breast cancer disease outcome (Finak et al, 2008), differentially expressed in (A) Mammary Gland (MG) compared to MCF7 tumor stroma, (B) MG compared to MDA-MB-231 tumor stroma, and MCF7 tumor stroma compared to MDA-MB-231 tumor stroma.

The Finak\_SDPP human gene names were converted to mouse official gene symbols for this study through the use of GeneCards.org (Weizmann Institute of Science), Jax MGI, and NCBI AceView.

**Gene Set Sources:**

Finak G, et al. Stromal gene expression predicts clinical outcome in breast cancer. *Nature Medicine* 14, 518 - 527 (2008)

Broad Institute Gene Set Enrichment Analysis, Gene Set: FINAK\_BREAST\_CANCER\_SDPP\_SIGNATURE

Mouse Genome Informatics (MGI). The Jackson Laboratory. Mir99ahg. <http://www.informatics.jax.org/marker/MGI:1919929>

Mouse Genome Informatics (MGI). The Jackson Laboratory. Trbv5. <http://www.informatics.jax.org/marker/MGI:98583>

AceView. National Center for Biotechnology Information (NCBI). C6orf168. <http://www.ncbi.nlm.nih.gov/IEB/Research/Acembly/av.cgi?db=human&c=Gene&l=C6orf168>
