# Supplementary material for: Decoding breast cancer tissue–stroma interactions using species-specific sequencing
Source: PubMed Central journal article supplement (PMC4534116; doi:10.1186/s13058-015-0616-x), 2015-08-13
Supplement: 13058_2015_616_MOESM8_ESM.pdf [file 13058_2015_616_MOESM8_ESM.pdf]

# Table S3: Alignment Statistics

The number of normalized reads and fraction of human- and mouse-specific reads in each sequenced sample.

'% expressed genes' is '# remaining genes' in Figure S1, '%reads' is '# reads from species1 after separation' divided by the sum of that value and '# reads from species2 after separation', '#reads' is '# reads from species1 after separation', '% read loss' is one minus the ratio of '# reads from species1 after separation' to '# reads from species1 before separation' and '% remaining genes' is '# remaining genes' divided by '# genes before separation'. The values that correspond to the 0.1-0.3% species misassignment frequency are marked in green.

**A**

| Sample Information      |       |    | % expressed genes  |         |           |       | % reads  |         | # reads |       |
|-------------------------|-------|----|--------------------|---------|-----------|-------|----------|---------|---------|-------|
|                         |       |    | human              |         | mouse     |       | human    | mouse   | human   | mouse |
|                         |       |    | Sample Description | Species | Sample ID | human | mouse    | human   | mouse   | human |
| Human skin 1, SRX800842 | human | H1 | 82.20              | 6.53    | 99.86     | 0.14  | 20888463 | 28262   |         |       |
| Human skin 2, SRX800868 | human | H2 | 80.30              | 8.93    | 99.80     | 0.20  | 42072767 | 84091   |         |       |
| Human skin 3, SRX800836 | human | H3 | 79.66              | 6.03    | 99.83     | 0.17  | 16586093 | 27870   |         |       |
| Mouse skin 1, ERX840616 | mouse | M1 | 13.81              | 64.81   | 0.23      | 99.77 | 19773    | 8748660 |         |       |
| Mouse skin 2, ERX840615 | mouse | M2 | 17.23              | 63.10   | 0.29      | 99.74 | 20024    | 6768565 |         |       |
| Mouse skin 3, ERX840617 | mouse | M3 | 13.02              | 67.13   | 0.27      | 99.73 | 13155    | 4794321 |         |       |

**B**

| Sample ID |       | % read loss |       | % remaining genes |       |
|-----------|-------|-------------|-------|-------------------|-------|
|           |       | human       | mouse | human             | mouse |
|           |       | human       | mouse | human             | mouse |
| H1        | 16.41 | 99.48       | 98.58 | 10.28             |       |
| H2        | 9.15  | 99.15       | 98.94 | 14.29             |       |
| H3        | 16.22 | 99.40       | 98.75 | 9.86              |       |
| M1        | 98.64 | 5.24        | 27.06 | 99.46             |       |
| M2        | 98.36 | 5.59        | 34.29 | 99.23             |       |
| M3        | 98.98 | 5.99        | 22.22 | 99.52             |       |

**C**

| Sample Information                                               |       |                      | % expressed genes  |         |           |       | % reads  |         | # reads |       |
|------------------------------------------------------------------|-------|----------------------|--------------------|---------|-----------|-------|----------|---------|---------|-------|
|                                                                  |       |                      | human              |         | mouse     |       | human    | mouse   | human   | mouse |
|                                                                  |       |                      | Sample Description | Species | Sample ID | human | mouse    | human   | mouse   | human |
| Notch1 receptor-expressing cells -ligand on cell, -inhibitor     | mixed | MDA231_3T3GFP_-DAPT  | 63.79              | 63.26   | 45.78     | 54.22 | 5535797  | 6556909 |         |       |
| Notch1 receptor-expressing cells -ligand on cell, +inhibitor     | mixed | MDA231_3T3GFP_+DAPT  | 63.74              | 63.57   | 44.37     | 55.63 | 5482753  | 6874231 |         |       |
| Notch1 receptor-expressing cells +ligand on cell, -inhibitor     | mixed | MDA231_3T3DLL4_-DAPT | 63.13              | 62.57   | 46.95     | 53.05 | 6132342  | 6928394 |         |       |
| Notch1 receptor-expressing cells +ligand on cell, +inhibitor     | mixed | MDA231_3T3DLL4_+DAPT | 63.61              | 62.53   | 47.40     | 52.60 | 6294273  | 6983919 |         |       |
| Notch1 receptor-expressing cells -ligand immobilized, -inhibitor | human | MDA231_Fc_-DAPT      | 66.31              | 20.43   | 99.90     | 0.10  | 11728605 | 11692   |         |       |
| Notch1 receptor-expressing cells -ligand immobilized, +inhibitor | human | MDA231_Fc_+DAPT      | 65.73              | 18.36   | 99.91     | 0.09  | 10818709 | 9902    |         |       |
| Notch1 receptor-expressing cells +ligand immobilized, -inhibitor | human | MDA231_Fc-DLL4_-DAPT | 65.73              | 18.53   | 99.91     | 0.09  | 11265842 | 10021   |         |       |
| Notch1 receptor-expressing cells +ligand immobilized, +inhibitor | human | MDA231_Fc-DLL4_+DAPT | 66.03              | 19.22   | 99.91     | 0.09  | 11661368 | 10945   |         |       |

**D**

| Sample ID            |       | % read loss |       | % remaining genes |       |
|----------------------|-------|-------------|-------|-------------------|-------|
|                      |       | human       | mouse | human             | mouse |
|                      |       | human       | mouse | human             | mouse |
| MDA231_3T3GFP_-DAPT  | 30.98 | 23.13       | 92.65 | 92.89             |       |
| MDA231_3T3GFP_+DAPT  | 31.96 | 22.36       | 92.61 | 92.76             |       |
| MDA231_3T3DLL4_-DAPT | 30.01 | 23.94       | 92.56 | 92.61             |       |
| MDA231_3T3DLL4_+DAPT | 29.67 | 24.15       | 92.65 | 92.39             |       |
| MDA231_Fc_-DAPT      | 6.77  | 99.62       | 99.02 | 35.64             |       |
| MDA231_Fc_+DAPT      | 6.76  | 99.66       | 98.92 | 32.37             |       |
| MDA231_Fc-DLL4_-DAPT | 6.74  | 99.66       | 98.94 | 32.60             |       |
| MDA231_Fc-DLL4_+DAPT | 6.70  | 99.65       | 98.93 | 33.71             |       |

**E**

| Sample Information                             |       |             | % expressed genes  |         |           |       | % reads  |       | # reads |       |
|------------------------------------------------|-------|-------------|--------------------|---------|-----------|-------|----------|-------|---------|-------|
|                                                |       |             | human              |         | mouse     |       | human    | mouse | human   | mouse |
|                                                |       |             | Sample Description | Species | Sample ID | human | mouse    | human | mouse   | human |
| MCF7 cells -ligand immobilized, -inhibitor     | human | MCF7WT_Fc   | 63.87              | 4.91    | 99.96     | 0.04  | 5359310  | 2234  |         |       |
| MCF7 cells -ligand immobilized, +inhibitor     | human | MCF7WT_Fc_1 | 67.10              | 6.85    | 99.96     | 0.04  | 11092079 | 4582  |         |       |
| MDAMB231 cells -ligand immobilized, -inhibitor | human | MDA_WT_Fc_2 | 67.69              | 7.58    | 99.96     | 0.04  | 13826522 | 5665  |         |       |
| MDAMB231 cells -ligand immobilized, +inhibitor | human | MDA_WT_Fc_3 | 66.30              | 6.09    | 99.96     | 0.04  | 11091367 | 3916  |         |       |

**F**

| Sample ID   |       | % read loss |       | % remaining genes |       |
|-------------|-------|-------------|-------|-------------------|-------|
|             |       | human       | mouse | human             | mouse |
|             |       | human       | mouse | human             | mouse |
| MCF7WT_Fc   | 11.49 | 99.85       | 98.63 | 9.16              |       |
| MCF7WT_Fc_1 | 8.34  | 99.85       | 99.07 | 12.11             |       |
| MDA_WT_Fc_2 | 7.67  | 99.84       | 99.13 | 13.31             |       |
| MDA_WT_Fc_3 | 7.13  | 99.87       | 99.16 | 10.89             |       |

**G**

| Sample Information                   |       |                   | % expressed genes  |         |           |       | % reads  |          | # reads |       |
|--------------------------------------|-------|-------------------|--------------------|---------|-----------|-------|----------|----------|---------|-------|
|                                      |       |                   | human              |         | mouse     |       | human    | mouse    | human   | mouse |
|                                      |       |                   | Sample Description | Species | Sample ID | human | mouse    | human    | mouse   | human |
| MCF7-EGFP in nude mouse, left tumor  | mixed | Mouse1L_MCF7-EGFP | 66.27              | 75.53   | 27.82     | 72.18 | 5499836  | 14266339 |         |       |
| MCF7-EGFP in nude mouse, right tumor | mixed | Mouse1R_MCF7-EGFP | 53.85              | 73.95   | 3.27      | 96.73 | 409957   | 12138342 |         |       |
| MCF7-EGFP in nude mouse, left tumor  | mixed | Mouse3L_MCF7-EGFP | 71.28              | 69.84   | 74.79     | 25.21 | 15840262 | 5338921  |         |       |
| MCF7-EGFP in nude mouse, right tumor | mixed | Mouse3R_MCF7-EGFP | 68.36              | 73.32   | 48.27     | 51.73 | 9680756  | 10374075 |         |       |
| MDA-MB-231 tumor + IgG               | mixed | Mouse1_IgG        | 71.96              | 66.12   | 86.35     | 13.65 | 32426279 | 5125434  |         |       |
| MDA-MB-231 tumor + IgG               | mixed | Mouse13_IgG       | 71.26              | 65.41   | 89.77     | 10.23 | 35026428 | 3990529  |         |       |
| MDA-MB-231 tumor + IgG               | mixed | Mouse22_IgG       | 73.34              | 69.58   | 80.45     | 19.55 | 33846241 | 8225212  |         |       |
| MDA-MB-231 tumor + IgG               | mixed | Mouse32_IgG       | 70.28              | 66.91   | 82.81     | 17.19 | 18270756 | 3792521  |         |       |

**H**

| Sample ID         |       | % read loss |       | % remaining genes |       |
|-------------------|-------|-------------|-------|-------------------|-------|
|                   |       | human       | mouse | human             | mouse |
|                   |       | human       | mouse | human             | mouse |
| Mouse1L_MCF7-EGFP | 43.48 | 17.76       | 87.63 | 97.28             |       |
| Mouse1R_MCF7-EGFP | 88.48 | 7.56        | 78.51 | 98.63             |       |
| Mouse3L_MCF7-EGFP | 15.48 | 46.78       | 92.96 | 93.97             |       |
| Mouse3R_MCF7-EGFP | 27.07 | 25.16       | 90.18 | 98.17             |       |
| Mouse1_IgG        | 9.35  | 61.78       | 94.53 | 91.50             |       |
| Mouse13_IgG       | 8.22  | 67.74       | 94.78 | 91.24             |       |
| Mouse22_IgG       | 10.76 | 50.88       | 94.32 | 93.39             |       |
| Mouse32_IgG       | 10.81 | 55.23       | 94.04 | 92.96             |       |

**I**

| Sample Information                         |       |                               | % expressed genes  |         |           |       | % reads |          | # reads |       |
|--------------------------------------------|-------|-------------------------------|--------------------|---------|-----------|-------|---------|----------|---------|-------|
|                                            |       |                               | human              |         | mouse     |       | human   | mouse    | human   | mouse |
|                                            |       |                               | Sample Description | Species | Sample ID | human | mouse   | human    | mouse   | human |
| 4th left mammary gland from NOD-SCID mouse | mouse | Left_Mammary_Gland_4_NOD-SCID | 25.19              | 71.39   | 0.14      | 99.86 | 17809   | 12925494 |         |       |

**J**

| Sample ID                     |       | % read loss |       | % remaining genes |       |
|-------------------------------|-------|-------------|-------|-------------------|-------|
|                               |       | human       | mouse | human             | mouse |
|                               |       | human       | mouse | human             | mouse |
| Left_Mammary_Gland_4_NOD-SCID | 99.46 | 5.78        | 40.96 | 99.34             |       |
