# Supplementary material for: Decoding breast cancer tissue–stroma interactions using species-specific sequencing
Source: Springer Nature journal article supplement (doi:10.1186/s13058-015-0616-x), 2015-08-11
Supplement: MOESM4 [file 9781526]

**Table S3:** Fold change for analysis of Notch activation by co-culture and immobilized ligand.

(A) Comparison of the number of genes upregulated after ligand-activation and downregulated with DAPT treatment, using noted cutoffs, in both co-culture and immobilized ligand assays, (B) gene list of (A) with comparison groups as in Figure 3E and red text indicating repeated gene listing, and (C) comparison of the number of genes up- and downregulated, using noted cutoffs, in MDA-MB-231 cultured with 3T3GFP or Fc.

**A**

| Comparison: Co-culture vs. Immobilized Ligand        |                                                          | Gene Expression | FC>2<br># of Genes |
|------------------------------------------------------|----------------------------------------------------------|-----------------|--------------------|
| MDA231/3T3DLL4<br>vs. MDA231/3T3GFP (-DAPT)          | vs. MDA231/Fc-DLL4<br>vs. MDA231/Fc (-DAPT)              | Upregulated     | 3                  |
| "Notch Signature"<br>in co-culture                   | vs. "Notch Signature"<br>on immobilized ligand           | In common       | 1                  |
| MDA231/3T3DLL4 (+DAPT)<br>vs. MDA231/3T3DLL4 (-DAPT) | vs. MDA231/Fc-DLL4 (+DAPT)<br>vs. MDA231/Fc-DLL4 (-DAPT) | Downregulated   | 10                 |

**B****3 common (2 unique) genes upregulated by DLL4 (101 vs. 47 genes)**

|               |                                                                  |
|---------------|------------------------------------------------------------------|
| FAM45B        | family with sequence similarity 45, member B (pseudogene)        |
| <b>FAM45B</b> | <b>family with sequence similarity 45, member B (pseudogene)</b> |
| DYRK4         | dual-specificity tyrosine-(Y)-phosphorylation regulated kinase 4 |

**1 common "Notch Signature" gene (63 vs. 29 genes)**

|         |                                 |
|---------|---------------------------------|
| SCARNA4 | small Cajal body-specific RNA 4 |
|---------|---------------------------------|

**10 common genes downregulated by DAPT (101 vs. 55 genes)**

|                 |                                                                       |
|-----------------|-----------------------------------------------------------------------|
| TRIM34          | tripartite motif containing 34                                        |
| SMG1P5          | SMG1 pseudogene 5                                                     |
| RNASEK-C17orf49 | RNASEK-C17orf49 readthrough                                           |
| LOC101928837    | uncharacterized ncRNA                                                 |
| LOC101928571    | ZNF649 antisense RNA 1                                                |
| INSL4           | insulin-like 4 (placenta)                                             |
| HES4            | hes family bHLH transcription factor 4                                |
| FRMD8P1         | FERM domain containing 8 pseudogene 1                                 |
| ECSCR           | endothelial cell surface expressed chemotaxis and apoptosis regulator |
| COX7B2          | cytochrome c oxidase subunit VIIb2                                    |

**C**

| Comparison: GFP vs. Fc |               | Gene Expression | FC>2<br># of Genes |
|------------------------|---------------|-----------------|--------------------|
| MDA231/3T3GFP          | vs. MDA231/Fc | Upregulated     | 352                |
|                        |               | Downregulated   | 97                 |
