# Supplementary material for: Decoding breast cancer tissue–stroma interactions using species-specific sequencing
Source: Springer Nature journal article supplement (doi:10.1186/s13058-015-0616-x), 2015-08-11
Supplement: MOESM9 [file 9781526]

**A**

| Comparison                                |                                               | Gene Expression | FC>2<br># of Genes | FDR<5%<br># of Genes | FC>2 & FDR<5%<br># of Genes |
|-------------------------------------------|-----------------------------------------------|-----------------|--------------------|----------------------|-----------------------------|
| MCF7 cells in tumor<br>(n=3)              | vs. MCF7 cells <i>in vitro</i><br>(n=2)       | Upregulated     | 2142               | 1                    | 1                           |
|                                           |                                               | Downregulated   | 1564               | 0                    | 0                           |
| MDA-MB-231 cells in tumor<br>(n=4)        | vs. MDA-MB-231 cells <i>in vitro</i><br>(n=2) | Upregulated     | 1456               | 1770                 | 1112                        |
|                                           |                                               | Downregulated   | 897                | 1189                 | 717                         |
| MDA-MB-231 cells <i>in vitro</i><br>(n=2) | vs. MCF7 cells <i>in vitro</i><br>(n=2)       | Upregulated     | 2935               | 1                    | 1                           |
|                                           |                                               | Downregulated   | 3459               | 0                    | 0                           |
| MDA-MB-231 cells in tumor<br>(n=4)        | vs. MCF7 cells in tumor<br>(n=3)              | Upregulated     | 3562               | 4635                 | 3388                        |
|                                           |                                               | Downregulated   | 3709               | 4609                 | 3479                        |

**B**

| Comparison                       |                                      | Gene Expression | FC>2<br># of Genes | FDR<5%<br># of Genes | FC>2 & FDR<5%<br># of Genes |
|----------------------------------|--------------------------------------|-----------------|--------------------|----------------------|-----------------------------|
| MCF7 tumor stroma<br>(n=3)       | vs. Mammary Gland<br>(n=1)           | Upregulated     | 7123               | 1                    | 1                           |
|                                  |                                      | Downregulated   | 959                | 0                    | 0                           |
| MDA-MB-231 tumor stroma<br>(n=4) | vs. Mammary Gland<br>(n=1)           | Upregulated     | 4090               | 1                    | 1                           |
|                                  |                                      | Downregulated   | 2171               | 0                    | 0                           |
| MCF7 tumor stroma<br>(n=3)       | vs. MDA-MB-231 tumor stroma<br>(n=4) | Upregulated     | 4394               | 3598                 | 3113                        |
|                                  |                                      | Downregulated   | 743                | 736                  | 609                         |

**Table S8:** Fold change and false discovery rate for analysis of gene expression in tumor and stroma.

A comparison of the number of genes up- or downregulated, using noted cutoffs, in cells (A) and stroma (B).

As false discovery rate (FDR) is influenced by the number of samples in a comparison group, and as the sample group size (n) differs between comparison groups, gene expression with a fold-change (FC) greater than 2 was used for analyses in this study.

For the algorithm which generated these FDR values, both comparison groups cannot have n=1, but one group with n=1 can be compared with another group with n>1. For these latter comparisons, the FDR variations come from the n>1 group rather than the n=1 group.
